# Supplementary material for: Outcomes of COVID-19 Patients under Cytotoxic Cancer Chemotherapy in Brazil
Source: PubMed Central journal article supplement (PMC7760330; doi:10.3390/cancers12123490), 2020-11-24
Supplement: cancers-12-03490-s001.pdf [file cancers-12-03490-s001.pdf]

# Supplemental Materials: Outcomes of COVID-19 Patients under Cytotoxic Cancer Chemotherapy in Brazil

Mateus Bringel Oliveira Duarte, Frederico Leal, Juliana Luz Passos Argenton and José Barreto Campello Carvalheira

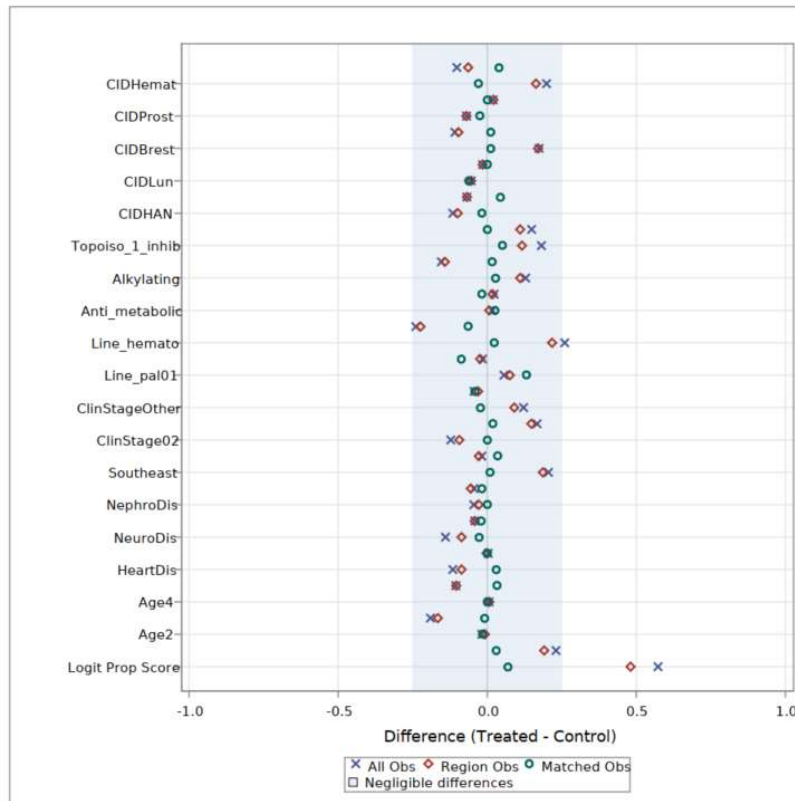

**Figure S1.** Standardized Mean Differences in Active versus non-Active chemotherapy Propensity Score. Abbreviations: CIDOther: Primary site: Other; CIDHemat: Primary Site: Hematologic; CIDProst: Primary Site: Prostate; CIDGine: Primary Site Gynecological; CIDBrest: Primary Site Breast; CIDSar: Primary Site Sarcomas; CIDLun: Primary Site Lung; CIDGI: Primary Site Gastrointestinal; CIDHAN: Primary Site Head and Neck; Line\_neo\_adj: Neoadjuvant, Definitive or Adjuvant Line of Treatment; Line\_hemato: Hematologic Line of Treatment; Line\_pal02: 2nd Line of Treatment; Line\_pal01: 1st Line of Treatment; ClinStageOther: Other Clinical Stage; ClinStageUnknown: Unknown Clinical Stage; ClinStage02: III/IV Clinical Stage; ClinStage01: I/II Clinical Stage; : Age1: Less than 50 years; Age2: 50 to 64 years; Age3: 65 to 79 years; Age 4: Greater or equal 80 years.

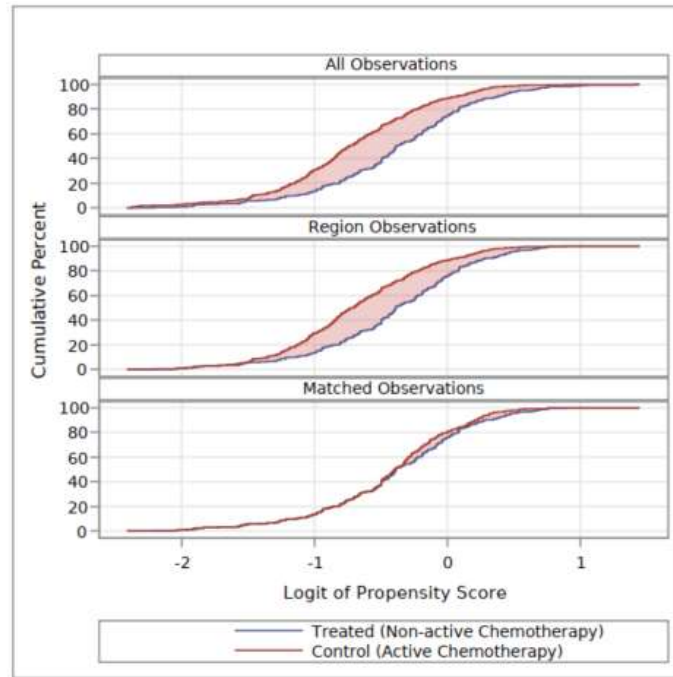

**Figure S2.** Cumulative Distribution of Logit Propensity Score in Active versus non-Active Chemotherapy Propensity Score.

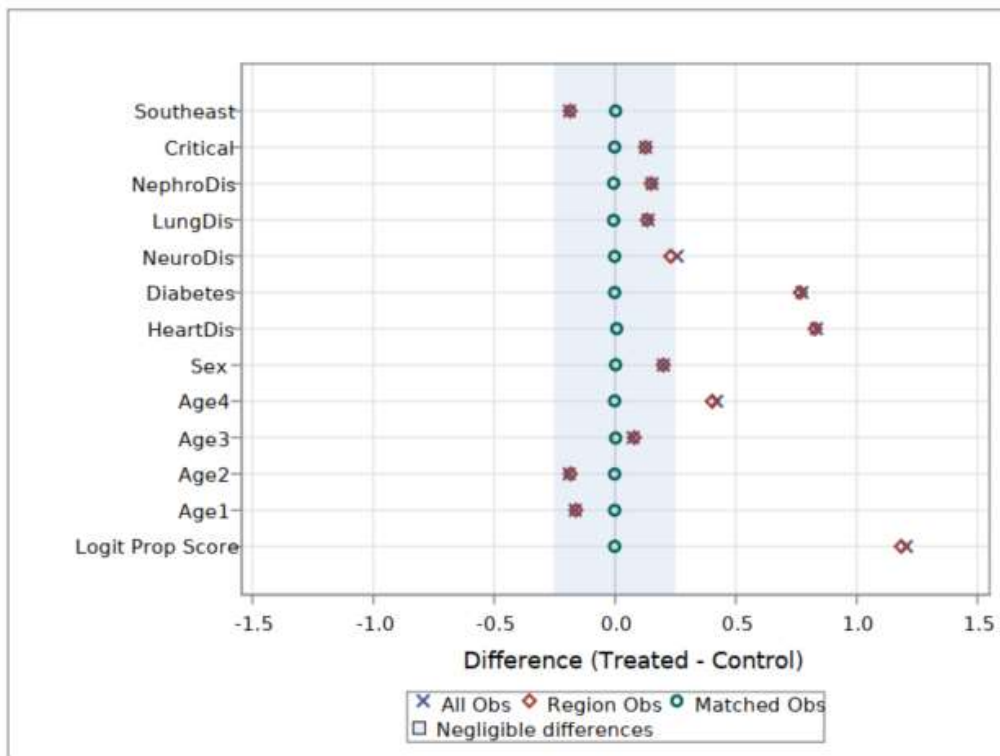

**Figure S3.** Standardized Mean Differences in Chemotherapy versus non-Cancer Controls Propensity Score. Abbreviations: Age1: Less than 50 years; Age2: 50 to 64 years; Age3: 65 to 79 years; Age 4: Greater or equal 80 years.

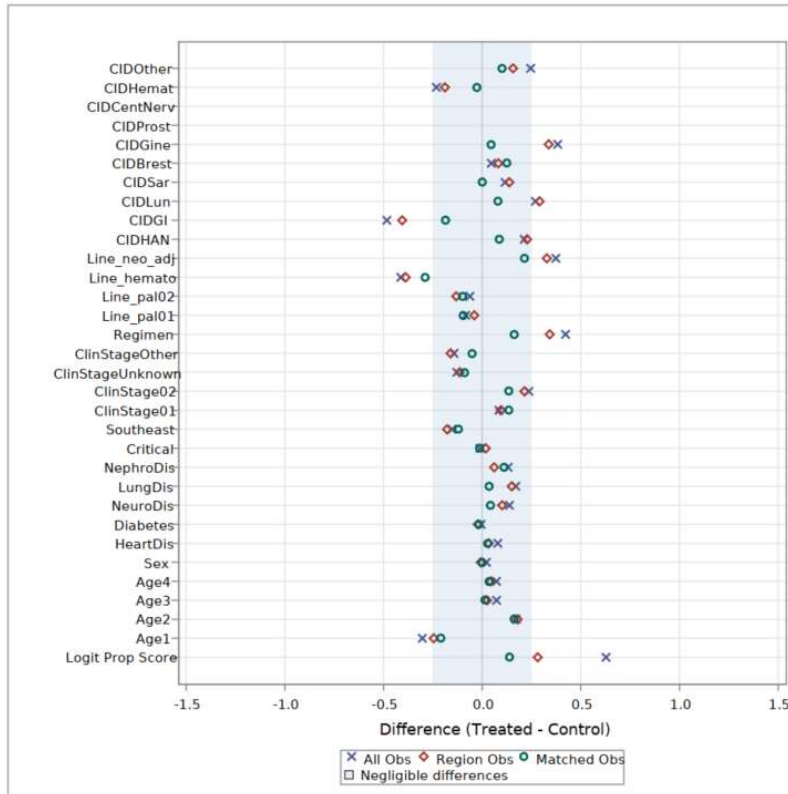

**Figure S4.** Standardized Mean Differences in Active Anti-Metabolic versus non-Active chemotherapy Propensity Score. Abbreviations: CIDOther: Primary site: Other; CIDHemat: Primary Site: Hematologic; CIDProst: Primary Site: Prostate; CIDGine: Primary Site Gynecological; CIDBrest: Primary Site Breast; CIDSar: Primary Site Sarcomas; CIDLun: Primary Site Lung; CIDGI: Primary Site Gastrointestinal; CIDHAN: Primary Site Head and Neck; Line\_neo\_adj: Neoadjuvant, Definitive or Adjuvant Line of Treatment; Line\_hemato: Hematologic Line of Treatment; Line\_pal02: 2nd Line of Treatment; Line\_pal01: 1st Line of Treatment; ClinStageOther: Other Clinical Stage; ClinStageUnknown: Unknown Clinical Stage; ClinStage02: III/IV Clinical Stage; ClinStage01: I/II Clinical Stage; Age1: Less than 50 years; Age2: 50 to 64 years; Age3: 65 to 79 years; Age 4: Greater or equal 80 years.

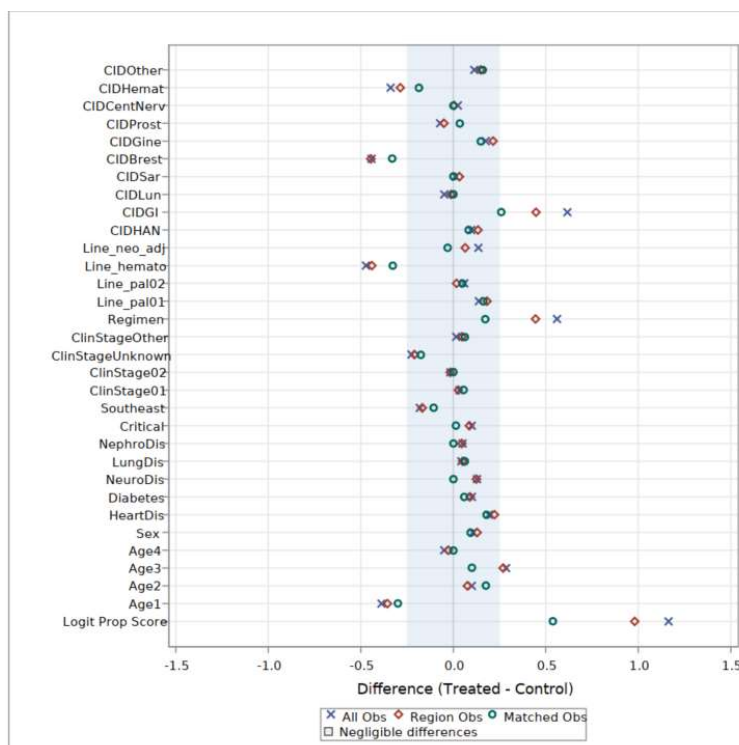

**Figure S5.** Standardized Mean Differences in Active Microtubule Inhibitor versus non-Active chemotherapy Propensity Score. Abbreviations: CIDOther: Primary site: Other; CIDHemat: Primary Site: Hematologic; CIDProst: Primary Site: Prostate; CIDGine: Primary Site Gynecological; CIDBrest: Primary Site Breast; CIDSar: Primary Site Sarcomas; CIDLun: Primary Site Lung; CIDGI: Primary Site Gastrointestinal; CIDHAN: Primary Site Head and Neck; Line\_neo\_adj: Neoadjuvant, Definitive or Adjuvant Line of Treatment; Line\_hemato: Hematologic Line of Treatment; Line\_pal02: 2nd Line of Treatment; Line\_pal01: 1st Line of Treatment; ClinStageOther: Other Clinical Stage; ClinStageUnknown: Unknown Clinical Stage; ClinStage02: III/IV Clinical Stage; ClinStage01: I/II Clinical Stage; Age1: Less than 50 years; Age2: 50 to 64 years; Age3: 65 to 79 years; Age 4: Greater or equal 80 years.

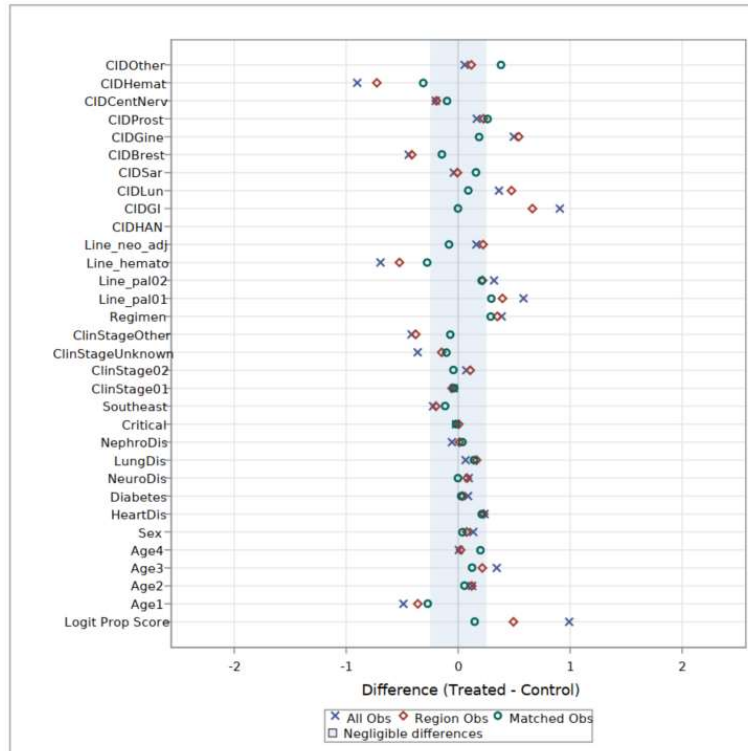

**Figure S6.** Standardized Mean Differences in Active Alkylating versus non-Active chemotherapy Propensity Score. Abbreviations: CIDOther: Primary site: Other; CIDHemat: Primary Site: Hematologic; CIDProst: Primary Site: Prostate; CIDGine: Primary Site Gynecological; CIDBrest: Primary Site Breast; CIDSar: Primary Site Sarcomas; CIDLun: Primary Site Lung; CIDGI: Primary Site Gastrointestinal; CIDHAN: Primary Site Head and Neck; Line\_neo\_adj: Neoadjuvant, Definitive or Adjuvant Line of Treatment; Line\_hemato: Hematologic Line of Treatment; Line\_pal02: 2nd Line of Treatment; Line\_pal01: 1st Line of Treatment; ClinStageOther: Other Clinical Stage; ClinStageUnknown: Unknown Clinical Stage; ClinStage02: III/IV Clinical Stage; ClinStage01: I/II Clinical Stage; Age1: Less than 50 years; Age2: 50 to 64 years; Age3: 65 to 79 years; Age 4: Greater or equal 80 years.

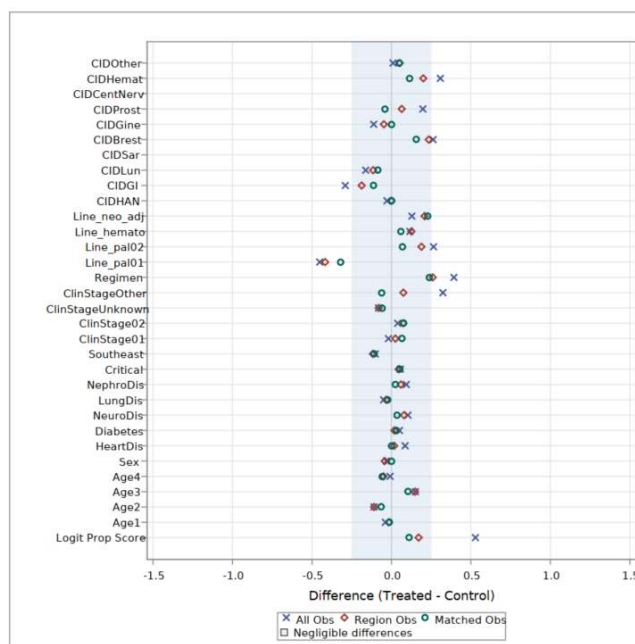

**Figure S7.** Standardized Mean Differences in Active Cisplatin versus non-Active chemotherapy Propensity Score. Abbreviations: CIDOther: Primary site: Other; CIDHemat: Primary Site: Hematologic; CIDProst: Primary Site: Prostate; CIDGine: Primary Site Gynecological; CIDBrest: Primary Site Breast; CIDSar: Primary Site Sarcomas; CIDLun: Primary Site Lung; CIDGI: Primary Site Gastrointestinal; CIDHAN: Primary Site Head and Neck; Line\_neo\_adj: Neoadjuvant, Definitive or Adjuvant Line of Treatment; Line\_hemato: Hematologic Line of Treatment; Line\_pal02: 2nd Line of Treatment; Line\_pal01: 1st Line of Treatment; ClinStageOther: Other Clinical Stage; ClinStageUnknown: Unknown Clinical Stage; ClinStage02: III/IV Clinical Stage; ClinStage01: I/II Clinical Stage; Age1: Less than 50 years; Age2: 50 to 64 years; Age3: 65 to 79 years; Age 4: Greater or equal 80 years.

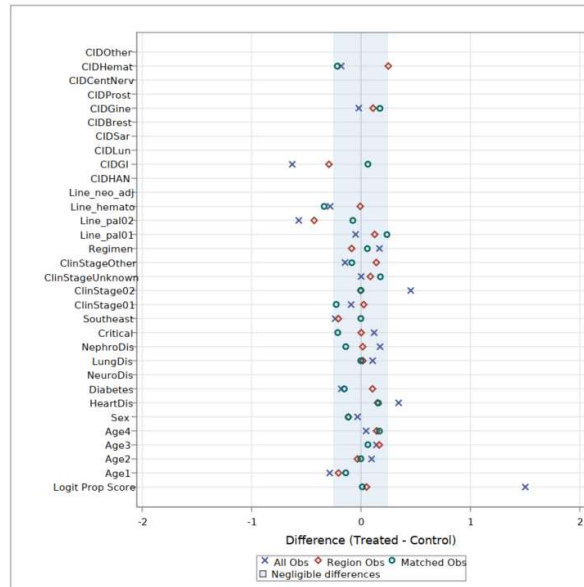

**Figure S8.** Standardized Mean Differences in Active Topoisomerase I Inhibitor versus non-Active chemotherapy Propensity Score. Abbreviations: CIDOther: Primary site: Other; CIDHemat: Primary Site: Hematologic; CIDProst: Primary Site: Prostate; CIDGine: Primary Site Gynecological; CIDBrest: Primary Site Breast; CIDSar: Primary Site Sarcomas; CIDLun: Primary Site Lung; CIDGI: Primary Site Gastrointestinal; CIDHAN: Primary Site Head and Neck; Line\_neo\_adj: Neoadjuvant, Definitive or Adjuvant Line of Treatment; Line\_hemato: Hematologic Line of Treatment; Line\_pal02: 2nd Line of Treatment; Line\_pal01: 1st Line of Treatment; ClinStageOther: Other Clinical Stage; ClinStageUnknown: Unknown Clinical Stage; ClinStage02: III/IV Clinical Stage; ClinStage01: I/II Clinical Stage; Age1: Less than 50 years; Age2: 50 to 64 years; Age3: 65 to 79 years; Age 4: Greater or equal 80 years.

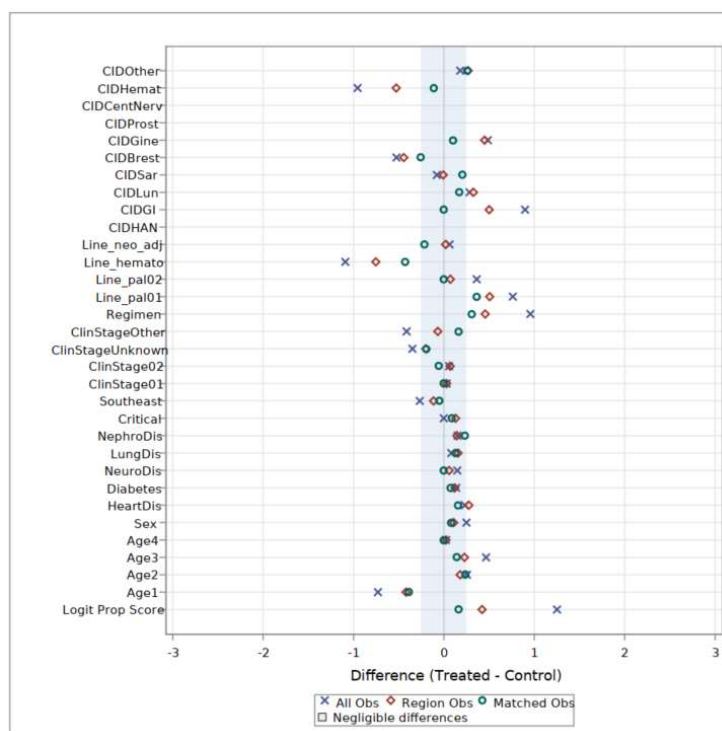

**Figure S9.** Standardized Mean Differences in Active Topoisomerase II inhibitor versus non-Active chemotherapy Propensity Score. Abbreviations: CIDOther: Primary site: Other; CIDHemat: Primary Site: Hematologic; CIDProst: Primary Site: Prostate; CIDGine: Primary Site Gynecological; CIDBrest: Primary Site Breast; CIDSar: Primary Site Sarcomas; CIDLun: Primary Site Lung; CIDGI: Primary Site Gastrointestinal; CIDHAN: Primary Site Head and Neck; Line\_neo\_adj: Neoadjuvant, Definitive or Adjuvant Line of Treatment; Line\_hemato: Hematologic Line of Treatment; Line\_pal02: 2nd Line of Treatment; Line\_pal01: 1st Line of Treatment; ClinStageOther: Other Clinical Stage; ClinStageUnknown: Unknown Clinical Stage; ClinStage02: III/IV Clinical Stage; ClinStage01: I/II Clinical Stage; Age1: Less than 50 years; Age2: 50 to 64 years; Age3: 65 to 79 years; Age 4: Greater or equal 80 years.

**Table S1.** Baseline variables before and after active and non-active chemotherapy and non-cancer groups propensity score matching.

| Characteristic | Non-Matched                          |                      | p       | Pair Matched                         |                       | p      | Standardized Mean Difference |          |          |
|----------------|--------------------------------------|----------------------|---------|--------------------------------------|-----------------------|--------|------------------------------|----------|----------|
|                | Active and Non-Active Chemo. n = 681 | Non-Cancer n = 38468 |         | Active and Non-Active Chemo. n = 681 | Non-Cancer n = 38,468 |        | All                          | Region   | Matched  |
| Age            |                                      |                      | <0.0001 |                                      |                       | 0.9999 |                              |          |          |
| <50 years      | 167 (24.5)                           | 10192 (26.5)         |         | 167 (24.5)                           | 166 (24.4)            |        | -0.16456                     | -0.16198 | -0.00361 |
| 50 to 64 years | 274 (40.2)                           | 11730 (30.5)         |         | 274 (40.2)                           | 274 (40.2)            |        | -0.18970                     | -0.18552 | 0.00000  |
| 65 to 79 years | 215 (31.6)                           | 11379 (29.6)         |         | 215 (31.6)                           | 216 (31.7)            |        | 0.07492                      | 0.07959  | 0.00312  |
| ≥80 years      | 25 (3.7)                             | 5167 (13.4)          |         | 25 (3.7)                             | 25 (3.7)              |        | 0.42036                      | 0.40231  | 0.00000  |
| Sex            |                                      |                      | <0.0001 |                                      |                       | 0.9566 | 0.19992                      | 0.19982  | 0.00295  |
| Male           | 307 (45.1)                           | 22118 (57.5)         |         | 307 (45.1)                           | 308 (45.2)            |        |                              |          |          |
| Female         | 374 (54.9)                           | 16350 (42.5)         |         | 374 (54.9)                           | 373 (54.8)            |        |                              |          |          |

|                       |            |              |             |            |            |        |          |          |          |
|-----------------------|------------|--------------|-------------|------------|------------|--------|----------|----------|----------|
| Comorbidities         |            |              |             |            |            |        |          |          |          |
| Heart Disease         | 143 (21)   | 15866 (41.2) | <0.000<br>1 | 143 (21)   | 145 (21.3) | 0.8944 | 0.83356  | 0.82771  | 0.00650  |
| Diabetes              | 104 (15.3) | 11333 (49)   | <0.000<br>1 | 104 (15.3) | 103 (15.1) | 0.9398 | 0.77371  | 0.76632  | -0.00337 |
| Neurologic disease    | 13 (1.9)   | 2026 (5.3)   | <0.000<br>1 | 13 (1.9)   | 13 (1.9)   | 1.0000 | 0.25685  | 0.23010  | 0.00000  |
| Chronic lung disease  | 29 (4.3)   | 2152 (5.6)   | 0.1319      | 29 (4.3)   | 28 (4.1)   | 0.8924 | 0.13670  | 0.13317  | -0.00627 |
| Nephropathy           | 39 (5.7)   | 2630 (6.8)   | 0.2546      | 39 (5.7)   | 38 (5.6)   | 0.9066 | 0.15248  | 0.14945  | -0.00550 |
| Critical Presentation | 158 (23.2) | 9848 (25.6)  | 0.1548      | 158 (23.2) | 158 (23.2) | 1.0000 | 0.12649  | 0.12562  | 0.00000  |
| Southeast             | 419 (61.5) | 19955 (51.9) | <0.000<br>1 | 419 (61.5) | 420 (61.7) | 0.9556 | -0.18862 | -0.18608 | 0.00298  |
| Logit Prop. Score     |            |              |             |            |            |        | 1.20518  | 1.18460  | 0.00000  |
| Outcome               |            |              | <0.000<br>1 |            |            | <.0001 |          |          |          |
| Hospital Discharge    | 239 (35.1) | 24213 (62.9) |             | 239 (35.1) | 464 (68.1) |        |          |          |          |
| Death                 | 442 (64.9) | 14255 (37.1) |             | 442 (64.9) | 217 (31.9) |        |          |          |          |

Table S2. Distribution of all cohort according to detailed Primary Site.

| Primary Site             | Active Chemotherapy (n = 431) | Non-Active Chemotherapy (n = 250) | Total (n = 681) |
|--------------------------|-------------------------------|-----------------------------------|-----------------|
| Mouth                    | 3 (0.70)                      | 4 (1.60)                          | 7               |
| Oropharynx               | 7 (1.62)                      | 3 (1.20)                          | 10              |
| Nasopharynx              | 0 (0.00)                      | 3 (1.20)                          | 3               |
| Other Head and Neck      | 1 (0.23)                      | 0 (0.00)                          | 1               |
| Esophagus                | 20 (4.64)                     | 9 (3.60)                          | 29              |
| Stomach                  | 19 (4.41)                     | 10 (4.00)                         | 29              |
| Colorectal               | 58 (13.46)                    | 52 (20.80)                        | 110             |
| Anus                     | 6 (1.39)                      | 2 (0.80)                          | 8               |
| Hepatic and biliary tree | 7 (1.62)                      | 1 (0.40)                          | 8               |
| Pancreas                 | 11 (2.55)                     | 4 (1.60)                          | 15              |
| Larynx                   | 5 (1.16)                      | 7 (2.80)                          | 12              |
| Lung                     | 30 (6.96)                     | 21 (8.40)                         | 51              |
| Bones                    | 3 (0.70)                      | 1 (0.40)                          | 4               |
| Skin melanoma            | 5 (1.16)                      | 1 (0.40)                          | 6               |
| Sarcomas                 | 7 (1.62)                      | 5 (2.00)                          | 12              |
| Breast                   | 66 (15.31)                    | 24 (9.60)                         | 90              |
| Cervix                   | 30 (6.96)                     | 17 (6.80)                         | 47              |
| Uterine                  | 4 (0.93)                      | 2 (0.80)                          | 6               |
| Ovaries                  | 8 (1.86)                      | 14 (5.60)                         | 22              |
| Penis                    | 1 (0.23)                      | 0 (0.00)                          | 1               |
| Prostate                 | 9 (2.09)                      | 8 (3.20)                          | 17              |
| Kidney                   | 0 (0.00)                      | 1 (0.40)                          | 1               |
| Bladder                  | 1 (0.23)                      | 8 (3.20)                          | 9               |
| Brain                    | 6 (1.39)                      | 3 (1.20)                          | 9               |
| Medulla                  | 2 (0.46)                      | 1 (0.40)                          | 3               |
| Endocrine glands         | 0 (0.00)                      | 1 (0.40)                          | 1               |
| Hodgkin lymphoma         | 6 (1.39)                      | 2 (0.80)                          | 8               |
| non-Hodgkin lymphoma     | 52 (12.06)                    | 20 (8.00)                         | 72              |
| Myeloma                  | 17 (3.94)                     | 8 (3.20)                          | 25              |
| Leukemias                | 36 (8.35)                     | 13 (5.20)                         | 49              |
| Other                    | 11 (2.55)                     | 5 (2.00)                          | 16              |

Table S3. Baseline variables according to Primary Site.



| Characteristic        | Head And Neck | Gastro-Intestinal | Others    | Lung      | Sarcoma   | Breast    | Gyneco-Logical | Prostate  | Central Nervous System | Haema-Tologic |
|-----------------------|---------------|-------------------|-----------|-----------|-----------|-----------|----------------|-----------|------------------------|---------------|
| Age                   |               |                   |           |           |           |           |                |           |                        |               |
| <50 years             | 5 (14.3)      | 29 (14.6)         | 3 (10.3)  | 1 (2)     | 11 (61.1) | 35 (38.9) | 26 (34.7)      | 0 (0)     | 4 (33.3)               | 53 (34.2)     |
| 50 to 64 years        | 21 (60)       | 91 (45.7)         | 13 (44.8) | 24 (47.1) | 6 (33.3)  | 35 (38.9) | 26 (34.7)      | 4 (23.5)  | 6 (50)                 | 48 (31)       |
| 65 to 79 years        | 9 (25.7)      | 76 (38.2)         | 11 (37.9) | 22 (43.1) | 1 (5.6)   | 17 (18.9) | 21 (28)        | 10 (58.8) | 2 (16.7)               | 46 (29.7)     |
| ≥80 years             | 0 (0)         | 3 (1.5)           | 2 (6.9)   | 4 (7.8)   | 0 (0)     | 3 (3.3)   | 2 (2.7)        | 3 (17.7)  | 0 (0)                  | 8 (5.2)       |
| Sex                   |               |                   |           |           |           |           |                |           |                        |               |
| Male                  | 28 (80)       | 110 (55.3)        | 19 (65.5) | 37 (72.6) | 11 (61.1) | 2 (2.2)   | 0 (0)          | 17 (100)  | 5 (41.7)               | 78 (50.3)     |
| Female                | 7 (20)        | 89 (44.7)         | 10 (34.5) | 14 (27.5) | 7 (38.9)  | 88 (97.8) | 75 (100)       | 0 (0)     | 7 (58.3)               | 77 (49.7)     |
| Comorbidities         |               |                   |           |           |           |           |                |           |                        |               |
| Heart Disease         | 6 (17.1)      | 39 (19.6)         | 9 (31)    | 12 (23.5) | 3 (16.7)  | 13 (14.4) | 18 (24)        | 8 (47.1)  | 0 (0)                  | 35 (22.6)     |
| Diabetes              | 3 (8.6)       | 34 (17.1)         | 6 (20.7)  | 6 (11.8)  | 2 (11.1)  | 9 (10)    | 11 (14.7)      | 3 (17.7)  | 3 (25)                 | 27 (17.4)     |
| Neurologic dis.       | 2 (5.7)       | 3 (1.5)           | 0 (0)     | 2 (3.9)   | 1 (5.6)   | 0 (0)     | 3 (4)          | 0 (0)     | 1 (8.3)                | 1 (0.7)       |
| Chronic lung dis.     | 3 (8.6)       | 8 (4)             | 1 (3.5)   | 9 (17.7)  | 0 (0)     | 1 (1.1)   | 2 (2.7)        | 1 (5.9)   | 0 (0)                  | 4 (2.6)       |
| Nephropathy           | 0 (0)         | 11 (5.5)          | 4 (13.8)  | 1 (2)     | 1 (5.6)   | 2 (2.2)   | 5 (6.7)        | 1 (5.9)   | 0 (0)                  | 14 (9)        |
| Critical Presentation | 6 (17.1)      | 43 (21.6)         | 4 (13.8)  | 11 (21.6) | 4 (22.2)  | 26 (28.9) | 24 (32)        | 1 (5.9)   | 4 (33.3)               | 35 (22.6)     |
| Southeast             | 21 (60)       | 110 (55.3)        | 17 (58.6) | 26 (51)   | 10 (55.6) | 66 (73.3) | 50 (66.7)      | 14 (82.4) | 11 (91.7)              | 94 (60.7)     |
| Clinical Stage        |               |                   |           |           |           |           |                |           |                        |               |
| I/II                  | 4 (11.4)      | 37 (18.6)         | 6 (20.7)  | 4 (7.8)   | 1 (5.6)   | 17 (18.9) | 12 (16)        | 1 (5.9)   | 0 (0)                  | 24 (15.5)     |
| III/IV                | 29 (82.9)     | 156 (78.4)        | 14 (48.3) | 47 (92.2) | 17 (94.4) | 68 (75.6) | 61 (81.3)      | 15 (88.2) | 0 (0)                  | 37 (23.9)     |
| Unknown               | 2 (5.7)       | 6 (3)             | 0 (0)     | 0 (0)     | 0 (0)     | 5 (5.6)   | 2 (2.7)        | 1 (5.9)   | 0 (0)                  | 18 (11.6)     |
| Other                 | 0 (0)         | 0 (0)             | 9 (31)    | 0 (0)     | 0 (0)     | 0 (0)     | 0 (0)          | 0 (0)     | 12 (100)               | 76 (49)       |
| Mult. Drug Reg.       | 11 (31.4)     | 127 (63.8)        | 16 (55.2) | 25 (49)   | 4 (22.2)  | 49 (54.4) | 29 (38.7)      | 1 (5.9)   | 3 (25)                 | 104 (67.1)    |
| Drug Class            |               |                   |           |           |           |           |                |           |                        |               |
| Anti-Metabolic        | 5 (14.3)      | 156 (78.4)        | 7 (24.1)  | 6 (11.8)  | 2 (11.1)  | 20 (22.2) | 8 (10.7)       | 0 (0)     | 0 (0)                  | 61 (39.4)     |
| Microtubule inhib.    | 12 (34.3)     | 19 (9.6)          | 11 (37.9) | 27 (52.9) | 5 (27.8)  | 51 (56.7) | 29 (38.7)      | 14 (82.4) | 3 (25)                 | 68 (43.9)     |

|                         |           |            |           |           |           |           |           |           |           |            |
|-------------------------|-----------|------------|-----------|-----------|-----------|-----------|-----------|-----------|-----------|------------|
| Alkylating              | 0 (0)     | 1 (0.5)    | 5 (17.2)  | 1 (2)     | 6 (33.3)  | 45 (50)   | 1 (1.3)   | 1 (5.9)   | 10 (83.3) | 98 (63.2)  |
| Cisplatin               | 29 (82.9) | 134 (67.3) | 22 (75.9) | 37 (72.6) | 2 (11.1)  | 10 (11.1) | 58 (77.3) | 3 (17.7)  | 0 (0)     | 18 (11.6)  |
| Type 1 topoiso. inhib.  | 0 (0)     | 29 (14.6)  | 0 (0)     | 0 (0)     | 0 (0)     | 0 (0)     | 5 (6.7)   | 0 (0)     | 0 (0)     | 12 (7.7)   |
| Type 2 topoiso. inhib.  | 1 (2.9)   | 1 (0.5)    | 2 (6.9)   | 5 (9.8)   | 7 (38.9)  | 40 (44.4) | 3 (4)     | 0 (0)     | 0 (0)     | 75 (48.4)  |
| Treatment               |           |            |           |           |           |           |           |           |           |            |
| Palliative 1st Line     | 18 (51.4) | 112 (56.3) | 22 (75.9) | 39 (76.5) | 17 (94.4) | 28 (31.1) | 48 (64)   | 2 (11.8)  | 12 (100)  | 0 (0)      |
| Palliative 2nd Line     | 0 (0)     | 23 (11.6)  | 0 (0)     | 0 (0)     | 0 (0)     | 15 (16.7) | 5 (6.7)   | 15 (88.2) | 0 (0)     | 0 (0)      |
| Hematological cancer    | 0 (0)     | 0 (0)      | 0 (0)     | 0 (0)     | 0 (0)     | 0 (0)     | 0 (0)     | 0 (0)     | 0 (0)     | 155 (100)  |
| Neoadj./Definit./Adjuv. | 17 (48.6) | 64 (32.2)  | 7 (24.1)  | 12 (23.5) | 1 (5.6)   | 47 (52.2) | 22 (29.3) | 0 (0)     | 0 (0)     | 0 (0)      |
| Active chemotherapy     | 18 (51.4) | 121 (60.8) | 15 (51.7) | 30 (58.8) | 11 (61.1) | 66 (73.3) | 42 (56)   | 9 (52.9)  | 8 (66.7)  | 111 (71.6) |
| Outcome                 |           |            |           |           |           |           |           |           |           |            |
| Hospital Discharge      | 17 (48.6) | 73 (36.7)  | 4 (13.8)  | 13 (25.5) | 5 (27.8)  | 39 (43.3) | 20 (26.7) | 4 (23.5)  | 5 (41.7)  | 59 (38.1)  |
| Death                   | 18 (51.4) | 126 (63.3) | 25 (86.2) | 38 (74.5) | 13 (72.2) | 51 (56.7) | 55 (73.3) | 13 (76.5) | 7 (58.3)  | 96 (61.9)  |

Abbreviations: Adjuv.: adjuvant; Definit.: Definitive; Inhib.: Inhibitor; Mult.: Multiple; Neoadj.: Neoadjuvant; Reg.: Regimen; Syst.: System; Topois. Topoisomerase.

**Table S4.** Baseline variables before and after active chemotherapy (**anti-metabolic**) use and non-active chemotherapy groups propensity score matching.

| Characteristic       | Non-Matched           |                           |        | Pair Matched          |                           |        | Standardized Mean Difference |          |          |  |
|----------------------|-----------------------|---------------------------|--------|-----------------------|---------------------------|--------|------------------------------|----------|----------|--|
|                      | Active Chemo. n = 169 | Non-Active Chemo. n = 250 | p      | Active Chemo. n = 168 | Non-Active Chemo. n = 168 | p      | All                          | Region   | Matched  |  |
| Age                  |                       |                           | 0.0200 |                       |                           | 0.2591 |                              |          |          |  |
| < 50 years           | 53 (31.4)             | 46 (18.4)                 |        | 52 (31)               | 37 (22)                   |        | -0.30323                     | -0.24584 | -0.20889 |  |
| 50 to 64 years       | 55 (32.5)             | 102 (40.8)                |        | 55 (32.7)             | 68 (40.5)                 |        | 0.17194                      | 0.17902  | 0.16116  |  |
| 65 to 79 years       | 57 (33.7)             | 93 (37.2)                 |        | 57 (33.9)             | 58 (34.5)                 |        | 0.07263                      | 0.02473  | 0.01245  |  |
| ≥ 80 years           | 4 (2.4)               | 9 (3.6)                   |        | 4 (2.4)               | 5 (3)                     |        | 0.07253                      | 0.04295  | 0.03501  |  |
| Sex                  |                       |                           | 0.8309 |                       |                           | 1.0000 | 0.02127                      | -0.00715 | 0.00000  |  |
| Male                 | 80 (47.3)             | 121 (48.4)                |        | 79 (47)               | 79 (47)                   |        |                              |          |          |  |
| Female               | 89 (52.7)             | 129 (51.6)                |        | 89 (53)               | 89 (53)                   |        |                              |          |          |  |
| Comorbidities        |                       |                           |        |                       |                           |        |                              |          |          |  |
| Heart Disease        | 35 (20.7)             | 60 (24)                   | 0.4301 | 35 (20.8)             | 37 (22)                   | 0.7903 | 0.07903                      | 0.03336  | 0.02860  |  |
| Diabetes             | 26 (15.4)             | 38 (15.2)                 | 0.9589 | 26 (15.5)             | 25 (14.9)                 | 0.8792 | -0.00513                     | -0.02249 | -0.01654 |  |
| Neurologic disease   | 2 (1.2)               | 8 (3.2)                   | 0.1846 | 2 (1.2)               | 3 (1.8)                   | 0.6523 | 0.13806                      | 0.10106  | 0.04075  |  |
| Chronic lung disease | 3 (1.8)               | 12 (4.8)                  | 0.1021 | 3 (1.8)               | 4 (2.4)                   | 0.7025 | 0.17025                      | 0.14965  | 0.03350  |  |
| Nephropathy          | 6 (3.6)               | 16 (6.4)                  | 0.1995 | 6 (3.6)               | 10 (6)                    | 0.3055 | 0.13134                      | 0.06072  | 0.10974  |  |

|                         |               |            |        |               |            |        |          |          |          |
|-------------------------|---------------|------------|--------|---------------|------------|--------|----------|----------|----------|
| Critical Presentation   | 42<br>(24.9)  | 61 (24.4)  | 0.9160 | 42 (25)       | 41 (24.4)  | 0.8993 | -0.01049 | 0.01805  | -0.01382 |
| Southeast               | 106<br>(62.7) | 138 (55.2) | 0.1256 | 105<br>(62.5) | 95 (56.6)  | 0.2664 | -0.15336 | -0.17784 | -0.12136 |
| Clinical Stage          |               |            | 0.2407 |               |            | 0.7499 |          |          |          |
| I/II                    | 26<br>(15.4)  | 42 (16.8)  |        | 26<br>(15.5)  | 31 (18.5)  |        | 0.08476  | 0.09377  | 0.13577  |
| III/IV                  | 106<br>(62.7) | 172 (68.8) |        | 105<br>(62.5) | 106 (63.1) |        | 0.23662  | 0.21421  | 0.13463  |
| Unknown                 | 9 (5.3)       | 7 (2.8)    |        | 9 (5.4)       | 6 (3.6)    |        | -0.12818 | -0.11400 | -0.09064 |
| Other                   | 28<br>(16.6)  | 29 (11.6)  |        | 28<br>(16.7)  | 25 (14.9)  |        | -0.14318 | -0.16012 | -0.05147 |
| Mult. Drug Regime       | 123<br>(72.8) | 132 (52.8) | <.0001 | 122<br>(72.6) | 109 (64.9) | 0.1260 | 0.42250  | 0.34201  | 0.16362  |
| Treatment               |               |            | 0.0020 |               |            | 0.2036 |          |          |          |
| Palliative 1st Line     | 78<br>(46.2)  | 105 (42)   |        | 78<br>(46.4)  | 70 (41.7)  |        | -0.08374 | -0.04000 | -0.09600 |
| Palliative 2nd Line     | 18<br>(10.7)  | 22 (8.8)   |        | 17<br>(10.1)  | 12 (7.1)   |        | -0.06250 | -0.13158 | -0.10049 |
| Hematological cancer    | 46<br>(27.2)  | 44 (17.6)  |        | 46<br>(27.4)  | 44 (26.2)  |        | -0.41241 | -0.38757 | -0.28971 |
| Neoadj./Definit./Adjuv. | 27 (16)       | 79 (31.6)  |        | 27<br>(16.1)  | 42 (25)    |        | 0.37327  | 0.32747  | 0.21332  |
| Primary Site            |               |            | <.0001 |               |            | 0.5745 |          |          |          |
| GI                      | 92<br>(54.4)  | 78 (31.2)  |        | 91<br>(54.2)  | 76 (45.2)  |        | -0.48313 | -0.40542 | -0.18563 |
| Head and Neck           | 4 (2.4)       | 17 (6.8)   |        | 4 (2.4)       | 7 (4.2)    |        | 0.21319  | 0.22747  | 0.08587  |
| Lung                    | 4 (2.4)       | 21 (8.4)   |        | 4 (2.4)       | 7 (4.2)    |        | 0.26974  | 0.29097  | 0.07984  |
| Others                  | 2 (1.2)       | 14 (5.6)   |        | 2 (1.2)       | 5 (3)      |        | 0.24582  | 0.15638  | 0.09939  |
| Breast                  | 14 (8.3)      | 24 (9.6)   |        | 14 (8.3)      | 20 (11.9)  |        | 0.04613  | 0.08179  | 0.12519  |
| Gynecological           | 5 (3)         | 33 (13.2)  |        | 5 (3)         | 7 (4.2)    |        | 0.38262  | 0.33713  | 0.04448  |
| Prostate                | 0 (0)         | 8 (3.2)    |        | 0 (0)         | 0 (0)      |        | .        | .        | .        |
| Cent. Nervous Syst.     | 0 (0)         | 4 (1.6)    |        | 0 (0)         | 0 (0)      |        | .        | .        | .        |
| Hematologic             | 46<br>(27.2)  | 44 (17.6)  |        | 46<br>(27.4)  | 44 (26.2)  |        | -0.23223 | -0.18893 | -0.02874 |
| Sarcomas                | 2 (1.2)       | 7 (2.8)    |        | 2 (1.2)       | 2 (1.2)    |        | 0.11590  | 0.13770  | 0.00000  |
| Logit Prop. Score       |               |            |        |               |            |        | 0.62757  | 0.28135  | 0.13854  |
| Outcome                 |               |            | 0.0635 |               |            | 0.1052 |          |          |          |
| Hospital Discharge      | 64<br>(37.9)  | 73 (29.2)  |        | 63<br>(37.5)  | 49 (29.2)  |        |          |          |          |
| Death                   | 105<br>(62.1) | 177 (70.8) |        | 105<br>(62.5) | 119 (70.8) |        |          |          |          |

Abbreviations: Adjuv.: adjuvant; Cent.: Central; Definit.: Definitive; GI: Gastrointestinal; Neoadj.: Neoadjuvant; Syst.: System.

**Table S5.** Baseline variables before and after active chemotherapy (**microtubule inhibitor**) use and non-active chemotherapy groups propensity score matching.

| Characteristic | Non-Matched           |                           |        | Pair Matched          |                           |        | Standardized Mean Difference |          |          |
|----------------|-----------------------|---------------------------|--------|-----------------------|---------------------------|--------|------------------------------|----------|----------|
|                | Active Chemo. n = 153 | Non-Active Chemo. n = 250 | p      | Active Chemo. n = 153 | Non-Active Chemo. n = 153 | p      | All                          | Region   | Matched  |
| Age            |                       |                           | 0.0008 |                       |                           | 0.0887 |                              |          |          |
| <50 years      | 54<br>(35.3)          | 46 (18.4)                 |        | 54<br>(35.3)          | 34 (22.2)                 |        | -0.38834                     | -0.35570 | -0.30048 |
| 50 to 64 years | 55 (36)               | 102 (40.8)                |        | 55 (36)               | 68 (44.4)                 |        | 0.09991                      | 0.07601  | 0.17494  |
| 65 to 79 years | 37<br>(24.2)          | 93 (37.2)                 |        | 37<br>(24.2)          | 44 (28.8)                 |        | 0.28509                      | 0.26946  | 0.10020  |

|                         |               |            |        |               |            |        |          |          |          |
|-------------------------|---------------|------------|--------|---------------|------------|--------|----------|----------|----------|
| ≥80 years               | 7 (4.6)       | 9 (3.6)    |        | 7 (4.6)       | 7 (4.6)    |        | −0.04926 | −0.02633 | 0.00000  |
| Sex                     |               |            | 0.3039 |               |            | 0.4216 | 0.10578  | 0.12889  | 0.09196  |
| Male                    | 66<br>(43.1)  | 121 (48.4) |        | 66<br>(43.1)  | 73 (47.7)  |        |          |          |          |
| Female                  | 87<br>(56.9)  | 129 (51.6) |        | 87<br>(56.9)  | 80 (52.3)  |        |          |          |          |
| Comorbidities           |               |            |        |               |            |        |          |          |          |
| Heart Disease           | 25<br>(16.3)  | 60 (24)    | 0.0674 | 25<br>(16.3)  | 36 (23.5)  | 0.1155 | 0.19177  | 0.22245  | 0.17999  |
| Diabetes                | 18<br>(11.8)  | 38 (15.2)  | 0.3333 | 18<br>(11.8)  | 21 (13.7)  | 0.6071 | 0.10071  | 0.09089  | 0.05748  |
| Neurologic disease      | 2 (1.3)       | 8 (3.2)    | 0.2358 | 2 (1.3)       | 2 (1.3)    | 1.0000 | 0.12779  | 0.12463  | 0.00000  |
| Chronic lung disease    | 6 (3.9)       | 12 (4.8)   | 0.6787 | 6 (3.9)       | 8 (5.2)    | 0.5843 | 0.04302  | 0.05061  | 0.06402  |
| Nephropathy             | 8 (5.2)       | 16 (6.4)   | 0.6297 | 8 (5.2)       | 8 (5.2)    | 1.0000 | 0.05007  | 0.04606  | 0.00000  |
| Critical Presentation   | 31<br>(20.3)  | 61 (24.4)  | 0.3368 | 31<br>(20.3)  | 32 (20.9)  | 0.8876 | 0.09950  | 0.08685  | 0.01571  |
| Southeast               | 98<br>(64.1)  | 138 (55.2) | 0.0800 | 98<br>(64.1)  | 90 (58.8)  | 0.3474 | −0.18116 | −0.16774 | −0.10701 |
| Clinical Stage          |               |            | 0.1427 |               |            | 0.3679 |          |          |          |
| I/II                    | 23 (15)       | 42 (16.8)  |        | 23 (15)       | 18 (11.8)  |        | 0.03351  | 0.02725  | 0.05679  |
| III/IV                  | 101 (66)      | 172 (68.8) |        | 101 (66)      | 109 (71.2) |        | −0.01591 | −0.01649 | 0.00000  |
| Unknown                 | 12 (7.8)      | 7 (2.8)    |        | 12 (7.8)      | 6 (3.9)    |        | −0.22611 | −0.21027 | −0.17582 |
| Other                   | 17<br>(11.1)  | 29 (11.6)  |        | 17<br>(11.1)  | 20 (13.1)  |        | 0.01541  | 0.04733  | 0.06180  |
| Mult. Drug Regime       | 120<br>(78.4) | 132 (52.8) | <.0001 | 120<br>(78.4) | 108 (70.6) | 0.1155 | 0.56040  | 0.44435  | 0.17148  |
| Treatment               |               |            | 0.0109 |               |            | 0.3774 |          |          |          |
| Palliative 1st Line     | 54<br>(35.3)  | 105 (42)   |        | 54<br>(35.3)  | 66 (43.1)  |        | 0.13804  | 0.18218  | 0.16145  |
| Palliative 2nd Line     | 11 (7.2)      | 22 (8.8)   |        | 11 (7.2)      | 13 (8.5)   |        | 0.05941  | 0.01727  | 0.04822  |
| Hematological cancer    | 49 (32)       | 44 (17.6)  |        | 49 (32)       | 37 (24.2)  |        | −0.47211 | −0.44009 | −0.32843 |
| Neoadj./Definit./Adjuv. | 39<br>(25.5)  | 79 (31.6)  |        | 39<br>(25.5)  | 37 (24.2)  |        | 0.13559  | 0.06410  | −0.02901 |
| Primary Site            |               |            | <.0001 |               |            | 0.0456 |          |          |          |
| GI                      | 12 (7.8)      | 78 (31.2)  |        | 12 (7.8)      | 27 (17.7)  |        | 0.61665  | 0.44701  | 0.25883  |
| Head and Neck           | 7 (4.6)       | 17 (6.8)   |        | 7 (4.6)       | 10 (6.5)   |        | 0.09617  | 0.13325  | 0.08476  |
| Lung                    | 15 (9.8)      | 21 (8.4)   |        | 15 (9.8)      | 15 (9.8)   |        | −0.04882 | −0.01198 | 0.00000  |
| Others                  | 5 (3.3)       | 14 (5.6)   |        | 5 (3.3)       | 10 (6.5)   |        | 0.11347  | 0.14784  | 0.15901  |
| Breast                  | 40<br>(26.1)  | 24 (9.6)   |        | 40<br>(26.1)  | 21 (13.7)  |        | −0.44225 | −0.44601 | −0.33197 |
| Gynecological           | 12 (7.8)      | 33 (13.2)  |        | 12 (7.8)      | 19 (12.4)  |        | 0.17526  | 0.21499  | 0.14968  |
| Prostate                | 7 (4.6)       | 8 (3.2)    |        | 7 (4.6)       | 8 (5.2)    |        | −0.07119 | −0.05029 | 0.03383  |
| Cent. Nervous Syst.     | 2 (1.3)       | 4 (1.6)    |        | 2 (1.3)       | 2 (1.3)    |        | 0.02447  | 0.00369  | 0.00000  |
| Hematologic             | 49 (32)       | 44 (17.6)  |        | 49 (32)       | 37 (24.2)  |        | −0.33875 | −0.28663 | −0.18417 |
| Sarcomas                | 4 (2.6)       | 7 (2.8)    |        | 4 (2.6)       | 4 (2.6)    |        | 0.01144  | 0.03320  | 0.00000  |
| Logit Prop. Score       |               |            |        |               |            |        | 1.16342  | 0.98048  | 0.53824  |
| Outcome                 |               |            | 0.0380 |               |            | 0.0709 |          |          |          |
| Hospital Discharge      | 60<br>(39.2)  | 73 (29.2)  |        | 60<br>(39.2)  | 45 (29.4)  |        |          |          |          |
| Death                   | 93<br>(60.8)  | 177 (70.8) |        | 93<br>(60.8)  | 108 (70.6) |        |          |          |          |

Abbreviations: Adjuv.: adjuvant; Cent.: Central; Definit.: Definitive; GI: Gastrointestinal; Neoadj.: Neoadjuvant; Syst.: System.

**Table S6.** Baseline variables before and after active chemotherapy (alkylating) use and non-active chemotherapy groups propensity score matching.

| Characteristic | Non-Matched | Pair Matched | Standardized mean difference |
|----------------|-------------|--------------|------------------------------|
|----------------|-------------|--------------|------------------------------|

|                         | Active<br>Chemo.<br>n = 115 | Non-active<br>Chemo. n =<br>250 | p       | Active<br>Chemo.<br>n = 108 | Non-active<br>Chemo. n =<br>108 | p      | All      | Region   | Matched  |
|-------------------------|-----------------------------|---------------------------------|---------|-----------------------------|---------------------------------|--------|----------|----------|----------|
| Age                     |                             |                                 | <0.0001 |                             |                                 | 0.2088 |          |          |          |
| <50 years               | 46 (40)                     | 46 (18.4)                       |         | 41 (38)                     | 28 (25.9)                       |        | -0.48905 | -0.36026 | -0.27253 |
| 50 to 64 years          | 40<br>(34.8)                | 102 (40.8)                      |         | 38<br>(35.2)                | 41 (38)                         |        | 0.12434  | 0.12069  | 0.05740  |
| 65 to 79 years          | 25<br>(21.7)                | 93 (37.2)                       |         | 25<br>(23.2)                | 31 (28.7)                       |        | 0.34411  | 0.21527  | 0.12365  |
| ≥80 years               | 4 (3.5)                     | 9 (3.6)                         |         | 4 (3.7)                     | 8 (7.4)                         |        | 0.00659  | 0.02159  | 0.20045  |
| Sex                     |                             |                                 | 0.2358  |                             |                                 | 0.7818 | 0.13417  | 0.07604  | 0.03730  |
| Male                    | 48<br>(41.7)                | 121 (48.4)                      |         | 43<br>(39.8)                | 45 (41.7)                       |        |          |          |          |
| Female                  | 67<br>(58.3)                | 129 (51.6)                      |         | 65<br>(60.2)                | 63 (58.3)                       |        |          |          |          |
| Comorbidities           |                             |                                 |         |                             |                                 |        |          |          |          |
| Heart Disease           | 17<br>(14.8)                | 60 (24)                         | 0.0450  | 17<br>(15.7)                | 26 (24.1)                       | 0.1251 | 0.23474  | 0.22601  | 0.21222  |
| Diabetes                | 14<br>(12.2)                | 38 (15.2)                       | 0.4423  | 14 (13)                     | 15 (13.9)                       | 0.8418 | 0.08813  | 0.04066  | 0.02697  |
| Neurologic disease      | 2 (1.7)                     | 8 (3.2)                         | 0.4270  | 2 (1.9)                     | 2 (1.9)                         | 1.0000 | 0.09424  | 0.07902  | 0.00000  |
| Chronic lung disease    | 4 (3.5)                     | 12 (4.8)                        | 0.5667  | 2 (1.9)                     | 5 (4.6)                         | 0.2490 | 0.06639  | 0.16457  | 0.13953  |
| Nephropathy             | 9 (7.8)                     | 16 (6.4)                        | 0.6163  | 8 (7.4)                     | 9 (8.3)                         | 0.8005 | -0.05550 | 0.01109  | 0.03604  |
| Critical Presentation   | 29<br>(25.2)                | 61 (24.4)                       | 0.8663  | 28<br>(25.9)                | 27 (25)                         | 0.8759 | -0.01893 | 0.00528  | -0.02144 |
| Southeast               | 76<br>(66.1)                | 138 (55.2)                      | 0.0498  | 73<br>(67.6)                | 67 (62)                         | 0.3926 | -0.22424 | -0.19864 | -0.11443 |
| Clinical Stage          |                             |                                 | <0.0001 |                             |                                 |        |          |          |          |
| I/II                    | 20<br>(17.4)                | 42 (16.8)                       |         | 19<br>(17.6)                | 16 (14.8)                       |        | -0.03887 | -0.05499 | -0.03762 |
| III/IV                  | 49<br>(42.6)                | 172 (68.8)                      |         | 49<br>(45.4)                | 58 (53.7)                       |        | 0.07249  | 0.10761  | -0.04385 |
| Unknown                 | 14<br>(12.2)                | 7 (2.8)                         |         | 8 (7.4)                     | 5 (4.6)                         |        | -0.36196 | -0.14742 | -0.10726 |
| Other                   | 32<br>(27.8)                | 29 (11.6)                       |         | 32<br>(29.6)                | 29 (26.9)                       |        | -0.41662 | -0.37892 | -0.07132 |
| Mult. Drug Regime       | 82<br>(71.3)                | 132 (52.8)                      | 0.0009  | 75<br>(69.4)                | 60 (55.6)                       | 0.0350 | 0.38846  | 0.34898  | 0.29157  |
| Treatment               |                             |                                 | <0.0001 |                             |                                 | 0.0288 |          |          |          |
| Palliative 1st Line     | 19<br>(16.5)                | 105 (42)                        |         | 19<br>(17.6)                | 33 (30.6)                       |        | 0.58335  | 0.39562  | 0.29680  |
| Palliative 2nd Line     | 2 (1.7)                     | 22 (8.8)                        |         | 2 (1.9)                     | 7 (6.5)                         |        | 0.32005  | 0.21824  | 0.20985  |
| Hematological cancer    | 66<br>(57.4)                | 44 (17.6)                       |         | 59<br>(54.6)                | 44 (40.7)                       |        | -0.69382 | -0.52491 | -0.27739 |
| Neoadj./Definit./Adjuv. | 28<br>(24.4)                | 79 (31.6)                       |         | 28<br>(25.9)                | 24 (22.2)                       |        | 0.16209  | 0.22287  | -0.08278 |
| Primary Site            |                             |                                 | <0.0001 |                             |                                 | 0.0490 |          |          |          |
| GI                      | 1 (0.9)                     | 78 (31.2)                       |         | 1 (0.9)                     | 1 (0.9)                         |        | 0.90776  | 0.66296  | 0.00000  |
| Head and Neck           | 0 (0)                       | 17 (6.8)                        |         | 0 (0)                       | 0 (0)                           |        | .        | .        | .        |
| Lung                    | 1 (0.9)                     | 21 (8.4)                        |         | 1 (0.9)                     | 3 (2.8)                         |        | 0.36407  | 0.47589  | 0.08953  |
| Others                  | 5 (4.4)                     | 14 (5.6)                        |         | 5 (4.6)                     | 14 (13)                         |        | 0.05762  | 0.11733  | 0.38347  |
| Breast                  | 30<br>(26.1)                | 24 (9.6)                        |         | 30<br>(27.8)                | 24 (22.2)                       |        | -0.44095 | -0.41375 | -0.14858 |
| Gynecological           | 1 (0.9)                     | 33 (13.2)                       |         | 1 (0.9)                     | 6 (5.6)                         |        | 0.49682  | 0.54124  | 0.18654  |
| Prostate                | 1 (0.9)                     | 8 (3.2)                         |         | 1 (0.9)                     | 5 (4.6)                         |        | 0.16563  | 0.22577  | 0.26322  |
| Cent. Nervous Syst.     | 6 (5.2)                     | 4 (1.6)                         |         | 6 (5.6)                     | 4 (3.7)                         |        | -0.20036 | -0.19409 | -0.10257 |
| Hematologic             | 66<br>(57.4)                | 44 (17.6)                       |         | 59<br>(54.6)                | 44 (40.7)                       |        | -0.90160 | -0.72655 | -0.31470 |

|                    |              |            |        |              |           |  |          |          |         |
|--------------------|--------------|------------|--------|--------------|-----------|--|----------|----------|---------|
| Sarcomas           | 4 (3.5)      | 7 (2.8)    |        | 4 (3.7)      | 7 (6.5)   |  | -0.03890 | -0.00654 | 0.15933 |
| Logit Prop. Score  |              |            |        |              |           |  | 0.99125  | 0.49339  | 0.14874 |
| Outcome            |              |            | 0.0003 |              |           |  |          |          | 0.0007  |
| Hospital Discharge | 56<br>(48.7) | 73 (29.2)  |        | 52<br>(48.2) | 28 (25.9) |  |          |          |         |
| Death              | 59<br>(51.3) | 177 (70.8) |        | 56<br>(51.9) | 80 (74.1) |  |          |          |         |

Abbreviations: Adjuv.: adjuvant; Cent.: Central; Definit.: Definitive; GI: Gastrointestinal; Neoadj.: Neoadjuvant; Syst.: System.

**Table S7.** Baseline variables before and after active chemotherapy (cisplatin) use and non-active chemotherapy groups propensity score matching.

| Characteristic          | Non-Matched                  |                                  | <i>p</i> | Pair Matched                 |                                  | <i>n</i> | Standardized mean difference |          |          |
|-------------------------|------------------------------|----------------------------------|----------|------------------------------|----------------------------------|----------|------------------------------|----------|----------|
|                         | Active Chemo. <i>n</i> = 186 | Non-active Chemo. <i>n</i> = 250 |          | Active Chemo. <i>n</i> = 186 | Non-active Chemo. <i>n</i> = 186 |          | All                          | Region   | Matched  |
| Age                     |                              |                                  | 0.4874   |                              |                                  | 0.7450   |                              |          |          |
| < 50 years              | 37<br>(19.9)                 | 46 (18.4)                        |          | 37<br>(19.9)                 | 36 (19.4)                        |          | -0.03794                     | -0.01636 | -0.01367 |
| 50 to 64 years          | 86<br>(46.2)                 | 102 (40.8)                       |          | 86<br>(46.2)                 | 80 (43)                          |          | -0.10982                     | -0.10891 | -0.06516 |
| 65 to 79 years          | 56<br>(30.1)                 | 93 (37.2)                        |          | 56<br>(30.1)                 | 65 (35)                          |          | 0.15052                      | 0.14817  | 0.10269  |
| ≥ 80 years              | 7 (3.8)                      | 9 (3.6)                          |          | 7 (3.8)                      | 5 (2.7)                          |          | -0.00868                     | -0.05026 | -0.05710 |
| Sex                     |                              |                                  | 0.7410   |                              |                                  | 10.000   | -0.03201                     | -0.04226 | 0.00000  |
| Male                    | 93 (50)                      | 121 (48.4)                       |          | 93 (50)                      | 93 (50)                          |          |                              |          |          |
| Female                  | 93 (50)                      | 129 (51.6)                       |          | 93 (50)                      | 93 (50)                          |          |                              |          |          |
| Comorbidities           |                              |                                  |          |                              |                                  |          |                              |          |          |
| Heart Disease           | 38<br>(20.4)                 | 60 (24)                          | 0.3771   | 38<br>(20.4)                 | 38 (20.4)                        | 1        | 0.08596                      | 0.01677  | 0.00000  |
| Diabetes                | 25<br>(13.4)                 | 38 (15.2)                        | 0.6054   | 25<br>(13.4)                 | 27 (14.5)                        | 0.7649   | 0.05024                      | 0.01838  | 0.03071  |
| Neurologic disease      | 3 (1.6)                      | 8 (3.2)                          | 0.2959   | 3 (1.6)                      | 4 (2.2)                          | 0.7028   | 0.10370                      | 0.07867  | 0.03513  |
| Chronic lung disease    | 11 (5.9)                     | 12 (4.8)                         | 0.6068   | 11 (5.9)                     | 10 (5.4)                         | 0.8223   | -0.04949                     | -0.03330 | -0.02388 |
| Nephropathy             | 8 (4.3)                      | 16 (6.4)                         | 0.3419   | 8 (4.3)                      | 9 (4.8)                          | 0.8039   | 0.09337                      | 0.05929  | 0.02392  |
| Critical Presentation   | 41 (22)                      | 61 (24.4)                        | 0.5653   | 41 (22)                      | 45 (24.2)                        | 0.6228   | 0.05584                      | 0.04503  | 0.05095  |
| Southeast               | 112<br>(60.2)                | 138 (55.2)                       | 0.2950   | 112<br>(60.2)                | 102 (54.8)                       | 0.2942   | -0.10165                     | -0.11664 | -0.10897 |
| Clinical Stage          |                              |                                  | 0.0138   |                              |                                  | 0.4355   |                              |          |          |
| I/II                    | 32<br>(17.2)                 | 42 (16.8)                        |          | 32<br>(17.2)                 | 42 (22.6)                        |          | -0.01869                     | 0.02445  | 0.06676  |
| III/IV                  | 140<br>(75.3)                | 172 (68.8)                       |          | 140<br>(75.3)                | 135 (72.6)                       |          | 0.03941                      | 0.07435  | 0.07559  |
| Unknown                 | 8 (4.3)                      | 7 (2.8)                          |          | 8 (4.3)                      | 6 (3.2)                          |          | -0.08118                     | -0.08027 | -0.05815 |
| Other                   | 6 (3.2)                      | 29 (11.6)                        |          | 6 (3.2)                      | 3 (1.6)                          |          | 0.32381                      | 0.07496  | -0.06237 |
| Mult. Drug Regime       | 133<br>(71.5)                | 132 (52.8)                       | <.0001   | 133<br>(71.5)                | 112 (60.2)                       | 0.0217   | 0.39305                      | 0.25952  | 0.23724  |
| Treatment               |                              |                                  | <.0001   |                              |                                  | 0.0261   |                              |          |          |
| Palliative 1st Line     | 119 (64)                     | 105 (42)                         |          | 119 (64)                     | 90 (48.4)                        |          | -0.45144                     | -0.41730 | -0.32025 |
| Palliative 2nd Line     | 5 (2.7)                      | 22 (8.8)                         |          | 5 (2.7)                      | 8 (4.3)                          |          | 0.26496                      | 0.18876  | 0.06992  |
| Hematological cancer    | 14 (7.5)                     | 44 (17.6)                        |          | 14 (7.5)                     | 21 (11.3)                        |          | 0.11608                      | 0.12563  | 0.05946  |
| Neoadj./Definit./Adjuv. | 48<br>(25.8)                 | 79 (31.6)                        |          | 48<br>(25.8)                 | 67 (36)                          |          | 0.12833                      | 0.20833  | 0.22627  |
| Primary Site            |                              |                                  | <.0001   |                              |                                  | 0.4996   |                              |          |          |
| GI                      | 84<br>(45.2)                 | 78 (31.2)                        |          | 84<br>(45.2)                 | 74 (39.8)                        |          | -0.29038                     | -0.18742 | -0.11182 |
| Head and Neck           | 14 (7.5)                     | 17 (6.8)                         |          | 14 (7.5)                     | 14 (7.5)                         |          | -0.02819                     | -0.00059 | 0.00000  |

|                     |               |            |        |               |            |          |          |          |
|---------------------|---------------|------------|--------|---------------|------------|----------|----------|----------|
| Lung                | 25<br>(13.4)  | 21 (8.4)   |        | 25<br>(13.4)  | 20 (10.8)  | -0.16215 | -0.11521 | -0.08647 |
| Others              | 10 (5.4)      | 14 (5.6)   |        | 10 (5.4)      | 12 (6.5)   | 0.00982  | 0.05253  | 0.04721  |
| Breast              | 6 (3.2)       | 24 (9.6)   |        | 6 (3.2)       | 13 (7)     | 0.26242  | 0.23443  | 0.15494  |
| Gynecological       | 32<br>(17.2)  | 33 (13.2)  |        | 32<br>(17.2)  | 32 (17.2)  | -0.11170 | -0.04774 | 0.00000  |
| Prostate            | 1 (0.5)       | 8 (3.2)    |        | 1 (0.5)       | 0 (0)      | 0.19756  | 0.06462  | -0.03989 |
| Cent. Nervous Syst. | 0 (0)         | 4 (1.6)    |        | 0 (0)         | 0 (0)      | .        | .        | .        |
| Hematologic         | 14 (7.5)      | 44 (17.6)  |        | 14 (7.5)      | 21 (11.3)  | 0.30749  | 0.20018  | 0.11488  |
| Sarcomas            | 0 (0)         | 7 (2.8)    |        | 0 (0)         | 0 (0)      | .        | .        | .        |
| Logit Prop. Score   |               |            |        |               |            | 0.52847  | 0.17099  | 0.11163  |
| Outcome             |               |            | 0.3559 |               |            | 0.5784   |          |          |
| Hospital Discharge  | 62<br>(33.3)  | 73 (29.2)  |        | 62<br>(33.3)  | 57 (30.7)  |          |          |          |
| Death               | 124<br>(66.7) | 177 (70.8) |        | 124<br>(66.7) | 129 (69.4) |          |          |          |

Abbreviations: Adjuv.: adjuvant; Cent.: Central; Definit.: Definitive; GI: Gastrointestinal; Neoadj.: Neoadjuvant; Syst.: System.

**Table S8.** Baseline variables before and after active chemotherapy (topoisomerase I inhibitor) use and non-active chemotherapy groups propensity score matching.

| Characteristic        | Non-Matched                 |                           |        | Pair Matched               |                          |        | Standardized mean difference |          |          |
|-----------------------|-----------------------------|---------------------------|--------|----------------------------|--------------------------|--------|------------------------------|----------|----------|
|                       | Active Chemo. Group n = 115 | Non-active Chemo. n = 250 | p      | Active Chemo. Group n = 34 | Non-active Chemo. n = 34 | p      | All                          | Region   | Matched  |
| Age                   |                             |                           | 0.3997 |                            |                          | 0.8967 |                              |          |          |
| < 50 years            | 11<br>(30.6)                | 46 (18.4)                 |        | 10<br>(29.4)               | 8 (23.5)                 |        | -0.28558                     | -0.20580 | -0.13820 |
| 50 to 64 years        | 13<br>(36.1)                | 102 (40.8)                |        | 12<br>(35.3)               | 12 (35.3)                |        | 0.09649                      | -0.03290 | 0.00000  |
| 65 to 79 years        | 11<br>(30.6)                | 93 (37.2)                 |        | 11<br>(32.4)               | 12 (35.3)                |        | 0.14073                      | 0.16657  | 0.06230  |
| ≥ 80 years            | 1 (2.8)                     | 9 (3.6)                   |        | 1 (2.9)                    | 2 (5.9)                  |        | 0.04681                      | 0.14196  | 0.16744  |
| Sex                   |                             |                           | 0.8575 |                            |                          | 0.6252 | -0.03201                     | -0.11512 | -0.11768 |
| Male                  | 18 (50)                     | 121 (48.4)                |        | 16<br>(47.1)               | 14 (41.2)                |        |                              |          |          |
| Female                | 18 (50)                     | 129 (51.6)                |        | 18<br>(52.9)               | 20 (58.8)                |        |                              |          |          |
| Comorbidities         |                             |                           |        |                            |                          |        |                              |          |          |
| Heart Disease         | 4 (11.1)                    | 60 (24)                   | 0.0828 | 4 (11.8)                   | 6 (17.7)                 | 0.4935 | 0.34376                      | 0.15007  | 0.15689  |
| Diabetes              | 8 (22.2)                    | 38 (15.2)                 | 0.2836 | 6 (17.7)                   | 4 (11.8)                 | 0.4935 | -0.18079                     | 0.10535  | -0.15144 |
| Neurologic disease    | 0 (0)                       | 8 (3.2)                   | 0.2763 | 0 (0)                      | 0 (0)                    | 1.0000 | .                            | .        | .        |
| Chronic lung disease  | 1 (2.8)                     | 12 (4.8)                  | 0.5860 | 1 (2.9)                    | 1 (2.9)                  | 1.0000 | 0.10606                      | 0.01677  | 0.00000  |
| Nephropathy           | 1 (2.8)                     | 16 (6.4)                  | 0.3901 | 1 (2.9)                    | 0 (0)                    | 0.3137 | 0.17376                      | 0.01534  | -0.14109 |
| Critical Presentation | 7 (19.4)                    | 61 (24.4)                 | 0.5138 | 7 (20.6)                   | 4 (11.8)                 | 0.3232 | 0.12000                      | 0.00155  | -0.21366 |
| Southeast             | 24<br>(66.7)                | 138 (55.2)                | 0.1943 | 23<br>(67.7)               | 23 (67.7)                | 1.0000 | -0.23666                     | -0.20718 | 0.00000  |
| Clinical Stage        |                             |                           | 0.7303 |                            |                          | 0.3062 |                              |          |          |
| I/II                  | 4 (11.1)                    | 42 (16.8)                 |        | 3 (8.8)                    | 0 (0)                    |        | -0.09055                     | 0.02481  | -0.22829 |
| III/IV                | 25<br>(69.4)                | 172 (68.8)                |        | 25<br>(73.5)               | 28 (82.4)                |        | 0.45419                      | -0.00353 | 0.00000  |
| Unknown               | 1 (2.8)                     | 7 (2.8)                   |        | 1 (2.9)                    | 2 (5.9)                  |        | 0.00135                      | 0.08543  | 0.17863  |
| Other                 | 6 (16.7)                    | 29 (11.6)                 |        | 5 (14.7)                   | 4 (11.8)                 |        | -0.14583                     | 0.13986  | -0.08465 |
| Mult. Drug Regime     | 22<br>(61.1)                | 132 (52.8)                | 0.3497 | 20<br>(58.8)               | 19 (55.9)                | 0.8063 | 0.16845                      | -0.08553 | 0.05961  |
| Treatment             |                             |                           | <.0001 |                            |                          | 0.5517 |                              |          |          |

|                         |              |            |        |              |           |          |          |          |
|-------------------------|--------------|------------|--------|--------------|-----------|----------|----------|----------|
| Palliative 1st Line     | 16<br>(44.4) | 105 (42)   |        | 16<br>(47.1) | 20 (58.8) | -0.04936 | 0.12523  | 0.23756  |
| Palliative 2nd Line     | 11<br>(30.6) | 22 (8.8)   |        | 10<br>(29.4) | 9 (26.5)  | -0.56893 | -0.42805 | -0.07692 |
| Hematological cancer    | 9 (25)       | 44 (17.6)  |        | 8 (23.5)     | 5 (14.7)  | -0.28218 | -0.00733 | -0.33722 |
| Neoadj./Definit./Adjuv. | 0 (0)        | 79 (31.6)  |        | 0 (0)        | 0 (0)     | .        | .        | .        |
| Primary Site            |              |            | 0.0070 |              |           | 0.5919   |          |          |
| GI                      | 22<br>(61.1) | 78 (31.2)  |        | 21<br>(61.8) | 22 (64.7) | -0.62897 | -0.29310 | 0.06185  |
| Head and Neck           | 0 (0)        | 17 (6.8)   |        | 0 (0)        | 0 (0)     | .        | .        | .        |
| Lung                    | 0 (0)        | 21 (8.4)   |        | 0 (0)        | 0 (0)     | .        | .        | .        |
| Others                  | 0 (0)        | 14 (5.6)   |        | 0 (0)        | 0 (0)     | .        | .        | .        |
| Breast                  | 0 (0)        | 24 (9.6)   |        | 0 (0)        | 0 (0)     | .        | .        | .        |
| Gynecological           | 5 (13.9)     | 33 (13.2)  |        | 5 (14.7)     | 7 (20.6)  | -0.02013 | 0.11025  | 0.17191  |
| Prostate                | 0 (0)        | 8 (3.2)    |        | 0 (0)        | 0 (0)     | .        | .        | .        |
| Cent. Nervous Syst.     | 0 (0)        | 4 (1.6)    |        | 0 (0)        | 0 (0)     | .        | .        | .        |
| Hematologic             | 9 (25)       | 44 (17.6)  |        | 8 (23.5)     | 5 (14.7)  | -0.18148 | 0.24932  | -0.21639 |
| Sarcomas                | 0 (0)        | 7 (2.8)    |        | 0 (0)        | 0 (0)     | .        | .        | .        |
| Logit Prop. Score       |              |            |        |              |           | 1.50208  | 0.05071  | 0.01030  |
| Outcome                 |              |            | 0.1297 |              |           | 0.0381   |          |          |
| Hospital Discharge      | 15<br>(41.7) | 73 (29.2)  |        | 15<br>(44.1) | 7 (20.6)  |          |          |          |
| Death                   | 21<br>(58.3) | 177 (70.8) |        | 19<br>(55.9) | 27 (79.4) |          |          |          |

Abbreviations: Adjuv.: adjuvant; Cent.: Central; Definit.: Definitive; GI: Gastrointestinal; Neoadj.: Neoadjuvant; Syst.: System.

**Table S9.** Baseline variables before and after active chemotherapy (topoisomerase II inhibitor) use and non-active chemotherapy groups propensity score matching.

| Characteristic        | Non-Matched                |                           |         | Pair Matched               |                        |        | Standardized Mean Difference |          |          |
|-----------------------|----------------------------|---------------------------|---------|----------------------------|------------------------|--------|------------------------------|----------|----------|
|                       | Active Chemo. Group n = 94 | Non-Active Chemo. n = 250 | p       | Active Chemo. Group n = 80 | Non-Active Chemo. n=80 | p      | All                          | Region   | Matched  |
| Age                   |                            |                           | <0.0001 |                            |                        | 0.1384 |                              |          |          |
| <50 years             | 48 (51.1)                  | 46 (18.4)                 |         | 35 (43.8)                  | 21 (26.3)              |        | -0.73036                     | -0.41925 | -0.39130 |
| 50 to 64 years        | 27 (28.7)                  | 102 (40.8)                |         | 26 (32.5)                  | 35 (43.8)              |        | 0.25566                      | 0.17936  | 0.23816  |
| 65 to 79 years        | 16 (17)                    | 93 (37.2)                 |         | 16 (20)                    | 21 (26.3)              |        | 0.46610                      | 0.22778  | 0.14437  |
| ≥80 years             | 3 (3.2)                    | 9 (3.6)                   |         | 3 (3.8)                    | 3 (3.8)                |        | 0.02256                      | 0.02301  | 0.00000  |
| Sex                   |                            |                           | 0.0422  |                            |                        | 0.6230 | 0.24948                      | 0.10766  | 0.07650  |
| Male                  | 34 (36.2)                  | 121 (48.4)                |         | 28 (35)                    | 31 (38.8)              |        |                              |          |          |
| Female                | 60 (63.8)                  | 129 (51.6)                |         | 52 (65)                    | 49 (61.3)              |        |                              |          |          |
| Comorbidities         |                            |                           |         |                            |                        |        |                              |          |          |
| Heart Disease         | 14 (14.9)                  | 60 (24)                   | 0.0670  | 13 (16.3)                  | 18 (22.5)              | 0.3173 | 0.23162                      | 0.27554  | 0.15897  |
| Diabetes              | 10 (10.6)                  | 38 (15.2)                 | 0.2765  | 9 (11.3)                   | 11 (13.8)              | 0.6326 | 0.13632                      | 0.12036  | 0.07471  |
| Neurologic disease    | 1 (1.1)                    | 8 (3.2)                   | 0.2687  | 1 (1.3)                    | 1 (1.3)                | 1.0000 | 0.14829                      | 0.05785  | 0.00000  |
| Chronic lung disease  | 3 (3.2)                    | 12 (4.8)                  | 0.5150  | 2 (2.5)                    | 4 (5)                  | 0.4053 | 0.08220                      | 0.15614  | 0.12775  |
| Nephropathy           | 3 (3.2)                    | 16 (6.4)                  | 0.2457  | 2 (2.5)                    | 6 (7.5)                | 0.1468 | 0.15058                      | 0.14340  | 0.23466  |
| Critical Presentation | 23 (24.5)                  | 61 (24.4)                 | 0.9895  | 20 (25)                    | 23 (28.8)              | 0.5926 | -0.00158                     | 0.12929  | 0.08727  |



|                         |           |            |         |           |           |         |          |          |          |
|-------------------------|-----------|------------|---------|-----------|-----------|---------|----------|----------|----------|
| Southeast               | 64 (68.1) | 138 (55.2) | 0.0305  | 50 (62.5) | 48 (60)   | 0.7455  | -0.26734 | -0.11527 | -0.05187 |
| Clinical Stage          |           |            | <0.0001 |           |           | 0.4955  |          |          |          |
| I/II                    | 16 (17)   | 42 (16.8)  |         | 15 (18.8) | 12 (15)   |         | 0.02947  | 0.03006  | 0.00000  |
| III/IV                  | 41 (43.6) | 172 (68.8) |         | 41 (51.3) | 43 (53.8) |         | 0.05797  | 0.06875  | -0.05893 |
| Unknown                 | 11 (11.7) | 7 (2.8)    |         | 8 (10)    | 4 (5)     |         | -0.34844 | -0.20114 | -0.19571 |
| Other                   | 26 (27.7) | 29 (11.6)  |         | 16 (20)   | 21 (26.3) |         | -0.41285 | -0.06784 | 0.16067  |
| Mult. Drug Regime       | 86 (91.5) | 132 (52.8) | <0.0001 | 72 (90)   | 62 (77.5) | 0.0321  | 0.95671  | 0.45678  | 0.30910  |
| Treatment               |           |            | <0.0001 |           |           | 0.1046  |          |          |          |
| Palliative 1st Line     | 10 (10.6) | 105 (42)   |         | 10 (12.5) | 22 (27.5) |         | 0.76213  | 0.50628  | 0.36452  |
| Palliative 2nd Line     | 1 (1.1)   | 22 (8.8)   |         | 1 (1.3)   | 1 (1.3)   |         | 0.36311  | 0.07171  | 0.00000  |
| Hematological cancer    | 56 (59.6) | 44 (17.6)  |         | 43 (53.8) | 39 (48.8) |         | -1.09115 | -0.75341 | -0.42761 |
| Neoadj./Definit./Adjuv. | 27 (28.7) | 79 (31.6)  |         | 26 (32.5) | 18 (22.5) |         | 0.06271  | 0.01817  | -0.21799 |
| Primary Site            |           |            | <0.0001 |           |           | 0.3504  |          |          |          |
| GI                      | 1 (1.1)   | 78 (31.2)  |         | 1 (1.3)   | 1 (1.3)   |         | 0.89813  | 0.50084  | 0.00000  |
| Head and Neck           | 0 (0)     | 17 (6.8)   |         | 0 (0)     | 0 (0)     |         | .        | .        | .        |
| Lung                    | 2 (2.1)   | 21 (8.4)   |         | 2 (2.5)   | 5 (6.3)   |         | 0.28369  | 0.32665  | 0.16961  |
| Others                  | 2 (2.1)   | 14 (5.6)   |         | 2 (2.5)   | 6 (7.5)   |         | 0.18090  | 0.26772  | 0.26049  |
| Breast                  | 28 (29.8) | 24 (9.6)   |         | 27 (33.8) | 19 (23.8) |         | -0.52481 | -0.44411 | -0.25997 |
| Gynecological           | 1 (1.1)   | 33 (13.2)  |         | 1 (1.3)   | 3 (3.8)   |         | 0.48525  | 0.44982  | 0.09996  |
| Prostate                | 0 (0)     | 8 (3.2)    |         | 0 (0)     | 0 (0)     |         | .        | .        | .        |
| Cent. Nervous Syst.     | 0 (0)     | 4 (1.6)    |         | 0 (0)     | 0 (0)     |         | .        | .        | .        |
| Hematologic             | 56 (59.6) | 44 (17.6)  |         | 43 (53.8) | 39 (48.8) |         | -0.95562 | -0.52806 | -0.11383 |
| Sarcomas                | 4 (4.3)   | 7 (2.8)    |         | 4 (5)     | 7 (8.8)   |         | -0.07895 | -0.00753 | 0.20343  |
| Logit Prop. Score       |           |            |         |           |           |         | 1.25126  | 0.42208  | 0.16195  |
| Outcome                 |           |            | <0.0001 |           |           | <0.0001 |          |          |          |
| Hospital Discharge      | 52 (55.3) | 73 (29.2)  |         | 46 (57.5) | 20 (25)   |         |          |          |          |
| Death                   | 42 (44.7) | 177 (70.8) |         | 34 (42.5) | 60 (75)   |         |          |          |          |

Abbreviations: Adjuv.: adjuvant; Cent.: Central; Definit.: Definitive; GI: Gastrointestinal; Neoadj.: Neoadjuvant; Syst.: System.

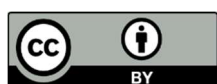

© 2020 by the authors. Licensee MDPI, Basel, Switzerland. This article is an open access article distributed under the terms and conditions of the Creative Commons Attribution (CC BY) license (<http://creativecommons.org/licenses/by/4.0/>).
